# Supplementary material for: The effect of SOX17, MACC1 and c-Met expression in ESCC on prognosis
Source: Research Square preprint supplement (doi:10.21203/rs.3.rs-255831/v1), 2021-03-03
Supplement: Supplementary file 1 [file 55b5e49b35f8755d5ff14f65.xlsx]

## Sheet: Sheet1
Clinicopathological characteristics	OS			PFS
	95%CI	HR	p-value	95%CI	HR	p-value
Age (years)
<60/≥60	0.469-0.949	0.686	0.023	0.49-0.938	0.678	0.019
Degree of differentiation
Poor/Moderate/Well	0.555-0.885	0.7	0.003	0.546-0.868	0.689	0.002
Lymph node metastasis
Negative/Positive	1.163-2.258	1.62	0.004	1.223-2.372	1.703	0.002
TNM stage
IA+B/IIA+B/IIIA+B/IVA+B	1.168-1.77	1.438	0.001	1.204-1.832	1.485	<0.001
Nerve invasion
Negative/Positive	2.331-1.122	1.617	0.01	1.056-2.194	1.522	0.024
Hematogenous metastasis
Negative/Positive	1.044-2.381	1.577	0.03	1.25-2.885	1.899	0.003
c-Met expression
Negative/Positive	1.049-2.012	1.453	0.025	0.991-1.894	1.37	0.057
